# Supplementary material
Source: publisher site journal article supplement (https://www.dovepress.com/get_supplementary_file.php?f=471448.docx)
Supplement: Supplementary file 1 [file get_supplementary_file.php]

**Supplemental Table 1.** Pre-survey questionnaire.

| Q1 | What do you consider to be the primary cause of tuberculosis? (single-choice)  □1-Bacteria □2-Heavy manual labour □3-Genetics □4-I don’t know |
| --- | --- |
| Q2 | What do you think are the typical symptoms of tuberculosis? (multiple-choice)  □1-Afternoon low grade fever □2-Coughing and expectoration □3-Hemoptysis  □4-Weakness or emaciation □5-High fever □6-Abdominal pain □7-I don’t know |
| Q3 | How do you think tuberculosis can be transmitted to others? (multiple-choice)  □1-Spitting □2-Coughing □3-Sneezing □4-Sharing utensils  □5-Blood transmission □6-Skin contact □7-I don’t know |
| Q4 | Do you think tuberculosis is usually curable?  □1-Yes □2-No □3-I don’t know |
| Q5 | Do you know about latent tuberculosis infection?  □1-Familiar with □2-Know a little bit □3-I don’t know |
| Q6 | Do you think latent tuberculosis infection can turn into active tuberculosis?  □1-Yes □2-No □3-I can’t tell |
| Q7 | Do you think tuberculosis preventive treatment can reduce the risk of active tuberculosis?  □1-Yes □2-No □3-I can’t tell |
| Q8 | How did you mainly acquire the knowledge about tuberculosis? (multiple-choice)  □1-Newspapers, magazines □2-Radio, film, television □3-School education  □4-Health promotion (e.g. posters, brochures) □5-Relatives and friends □6-Doctors |
| Q9 | If the results show that you have latent tuberculosis infection and your doctor recommends tuberculosis preventive treatment, will you accept it?  □1-Yes □2-No □3-I can’t tell |
| Q10 | If you need tuberculosis preventive treatment, will your family and friends support it?  □1-Yes □2-No □3-I can’t tell |
| Q11 | Do you think having TB is looked down upon?  □1-Yes □2-No □3-I can’t tell |
| Q12 | Would you be embarrassed if others knew you were taking anti-tuberculosis medicines?  □1-Yes □2-No □3-I can’t tell |

**Supplemental Table 2.** Formal questionnaire.

| Participant information | |
| --- | --- |
| Q1 | Your name(Given name/Surname) ________ |
| Q2 | Gender □1-Male □2-Female |
| Q3 | Where do you currently live? □1-Urban □2-Rural |
| Q4 | Do you have health insurance? □1-Yes □2-No |
| Q5 | Marital status □1-Single □2-Married □3-Separated  □4-Divorced □5-Widowed □6-Others ________ |
| Q6 | Type of families □1-Living alone □2-Living with partner  □3-Living with partner and children □4-Living with children only  □5-Living with parents only □6-Living with partner and parents  □7-Living with partner, children and parents □8-Others ________ |
| Q7 | Household income per capita (￥/month) □1-＜4000 □2-4000~8000 □3-＞8000 |
| Q8 | Education level □1-Primary school or less □2-Lower secondary school  □3-Higher secondary school □4-University or above |
| Q9 | Occupation  □1-Employee (e.g. enterprises, institutions, military personnel) □2-Unemployed □3-Retired  □4-Homemakers □5-Students □6-Others _______ (e.g. Farmers, self-employed, freelance) |
| Q10 | Labor time  □1-＜4 hours/day (or ＜28 hours/week) □2-4~8 hours/day (or 28 ~56 hours/week)  □3-8~12 hours/day (or 56 ~84 hours/week) □4-＞12 hours/day (or ＞84 hours/week) |
| Q11 | Type of rheumatic disease  □1-Systemic lupus erythematosus □2-Rheumatoid arthritis □3-Ankylosing spondylitis  □4-Sjogren's syndrome □5-Dermatomyositis/polymyositis  □6-Scleroderma/systemic sclerosis□7-Behçet's disease □8-Takayasu arteritis □9-Others: |
| Tuberculosis knowledge and practice | |
| Q1 | What do you consider to be the primary cause of tuberculosis? (single-choice)  □1-Bacteria □2-Heavy manual labour □3-Genetics □4-I don’t know |
| Q2 | What do you think are the typical symptoms of tuberculosis? (multiple-choice)  □1-Fever □2-Coughing and expectoration □3-Hemoptysis  □4-Weakness or emaciation □5-Abdominal pain □6-I don’t know |
| Q3 | How do you think tuberculosis can be transmitted to others? (multiple-choice)  □1-Spitting □2-Coughing □3-Sneezing □4-Sharing utensils  □5-Blood transmission □6-Skin contact □7-I don’t know |
| Q4 | Do you think tuberculosis is usually curable?  □1-Yes □2-No □3-I don’t know |
| Q5 | Is there any difference in the risk of tuberculosis among people with rheumatic diseases compared with other people?  □1-About the same  □2-Patients with rheumatic diseases are more likely to develop tuberculosis  □3-Patients with rheumatic diseases are less likely to develop tuberculosis  □4-I don’t know |
| Q6 | Do you think having TB is looked down upon?  □1-Yes □2-No □3-I can’t tell |
| Q7 | Would you be embarrassed if others knew you were taking anti-tuberculosis medicines?  □1-Yes □2-No □3-I can’t tell |
| Q8 | Has your rheumatologist recommended tuberculosis infection screening?  □1-Yes □2-No □3-I can’t tell |
| Q9 | Do you know about latent tuberculosis infection?  □1-Familiar with □2-Know a little bit □3-I don’t know (skip to Q12) |
| Q10 | Do you think latent tuberculosis infection can turn into active tuberculosis?  □1-Yes □2-No □3-I can’t tell |
| Q11 | Do you think tuberculosis preventive treatment can reduce the risk of active tuberculosis?  □1-Yes □2-No □3-I can’t tell |
| Q12 | If your doctor recommended LTBI screening, would you accept it?  □1-Yes (skip to Q14) □2-No (skip to Q13)  □3-I can’t tell (Encourage answering Q13 and then proceeding to Q14) |
| Q13 | What are your concerns that prevent you from undergoing LTBI screening? (skip to Q19)  □1-Unwilling to draw blood □2-Unwilling to go back to the hospital to get the results  □3-I am unlikely to get tuberculosis □4-Tuberculosis is not a serious disease  □5-Distrust the medical institution □6-The price is too high □7-Others |
| Q14 | If the results show that you have latent tuberculosis infection and your doctor recommends tuberculosis preventive treatment, will you accept it?  □1-Yes (skip to Q16) □2-No (skip to Q15)  □3-I can’t tell (Encourage answering Q15 and then proceeding to Q16) |
| Q15 | What are your concerns that prevent you from undergoing preventive treatment? (skip to Q19)  □1-The side efffects of drugs are terrible □2-I am unlikely to get tuberculosis  □3-Tuberculosis is not a serious disease □4-Distrust the medical institution  □5-The price is too high □6-Taking many pills per day is too hard  □7-It’s difficult to insist a long course of treatment □8-Others |
| Q16 | If you need tuberculosis preventive treatment, how many extra anti-tuberculosis pills/capsules per day will be intolerable for you?  □1-3 pills/capsules □2-6 pills/capsules □3-9 pills/capsules □4-no matter how many |
| Q17 | If you need tuberculosis preventive treatment, how long anti-tuberculosis treatment course will be intolerable for you?  □1-1 month □2-3 months □3-4 months □4-6 months □5-9 months  □6-12 months □7-18 months □8-no matter how long |
| Q18 | If you need tuberculosis preventive treatment, which department would you prefer to start treatment and regularly monitor the efficacy and adverse reactions?  □1-The rheumatologists prescribe tuberculosis preventive treatment and regularly go to the rheumatology clinic to evaluate the efficacy and adverse reactions, and obtain the next cycle of anti-tuberculosis drugs.  □2-Be refered to the infectious disease clinic. The infectious disease doctor issue a prescription and regularly go to the infectious disease department to evaluate the efficacy and adverse reactions, and obtain the next cycle of anti-tuberculosis drugs.  □3-Follow the advice of the rheumatologist and go to the infectious disease department for treatment on myself. The infectious disease doctor issue a prescription and regularly go to the infectious disease department to evaluate the efficacy and adverse reactions, and obtain the next cycle of anti-tuberculosis drugs. |
| Q19 | If you need tuberculosis preventive treatment, will your family and friends support it?  □1-Yes □2-No □3-I can’t tell |
| Q20 | How did you mainly acquire the knowledge about tuberculosis? (multiple-choice)  □1-Newspapers, magazines □2-Radio, film, television □3-School education  □4-Health promotion (e.g. posters, brochures) □5-Relatives and friends □6-Doctors |
